# Supplementary material
Source: PubMed Central journal article supplement (PMC5577368)
Supplement: NIHMS864512-supplement-1.pdf [file NIHMS864512-supplement-1.pdf]

## Supplementary Information

### **Oxidation of phosphorothioate DNA modifications leads to lethal genomic instability**

Stefanie Kellner<sup>1§</sup>, Michael S. DeMott<sup>1§</sup>, Ching Pin Cheng<sup>1</sup>, Brandon Russell,<sup>1,¶</sup> Bo Cao,<sup>1</sup>  
Delin You<sup>2</sup> & Peter C. Dedon<sup>1,3\*</sup>

<sup>1</sup>Department of Biological Engineering, Massachusetts Institute of Technology, Cambridge, MA, USA; <sup>2</sup>State Key Laboratory of Microbial Metabolism and School of Life Sciences and Biotechnology, Shanghai Jiao Tong University, Shanghai, China; <sup>3</sup>Singapore-MIT Alliance for Research and Technology, Singapore.

§ These authors contributed equally to this work.

¶ Present address: GlaxoSmithKline, Houston, TX

#### **Content:**

**Supplementary Figure 1:** *dnd* genes and their corresponding functions.

**Supplementary Figure 2:** Influence of growth state on the response to oxidant exposure.

**Supplementary Figure 3:** HOCl sensitivity of  $\Delta dndF-H$  and  $\Delta dndB$  *S. enterica* strains compared with wild-type and  $\Delta dndB-H$ .

**Supplementary Figure 4:** Reaction of PT-containing dinucleotides with H<sub>2</sub>O<sub>2</sub> and HOCl.

**Supplementary Figure 5:** Agarose gel analysis of DNA isolated from oxidant-treated bacteria after 10 to 40 min of incubation.

**Supplementary Figure 6:** Mass spectrum showing the different d(G<sub>ps</sub>T) isotopomers.

**Supplementary Figure 7:** Estimation of the rate of PT turnover in untreated wild-type *S. enterica* serovar Cerro 87.

**Supplementary Figure 8:** Percentage of all PT replaced or repaired over time.

**Supplementary Figure 9:** Full, uncut agarose gel images for Figures 4a and 4b.

**Supplementary Table 1:** Overview of bacterial strains and their PT levels.

**Supplementary Table 2:** Parameters for LC-MS/MS detection of PT isotopomers

**Supplementary Table 3:** Doses of H<sub>2</sub>O<sub>2</sub> and HOCl used in analysis of DNA damage in bacteria

## Supplementary Results

Supplementary Figure 1: *dnd* genes and their corresponding functions.

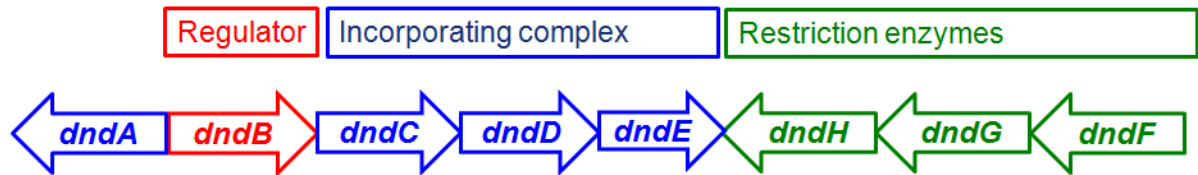

**Supplementary Figure 2: Influence of growth state on the response to oxidant exposure.** Wild-type (blue; PT+) and  $\Delta dndB-H$  (red; PT-) *S. enterica* serovar Cerro 87 cultures were exposed to either H<sub>2</sub>O<sub>2</sub> (left column) or HOCl (right column) in stationary phase (following from overnight growth; dashed lines) or log phase (after 1 h of growth in fresh medium; solid lines). While exposure to H<sub>2</sub>O<sub>2</sub> leads to a difference in both growth and survival depending on the growth state and experimental conditions, no such effect was observed for HOCl. Data for growth rate represent mean  $\pm$  SD for 3 technical replicates. Data for survival represent a single illustrative experiment.

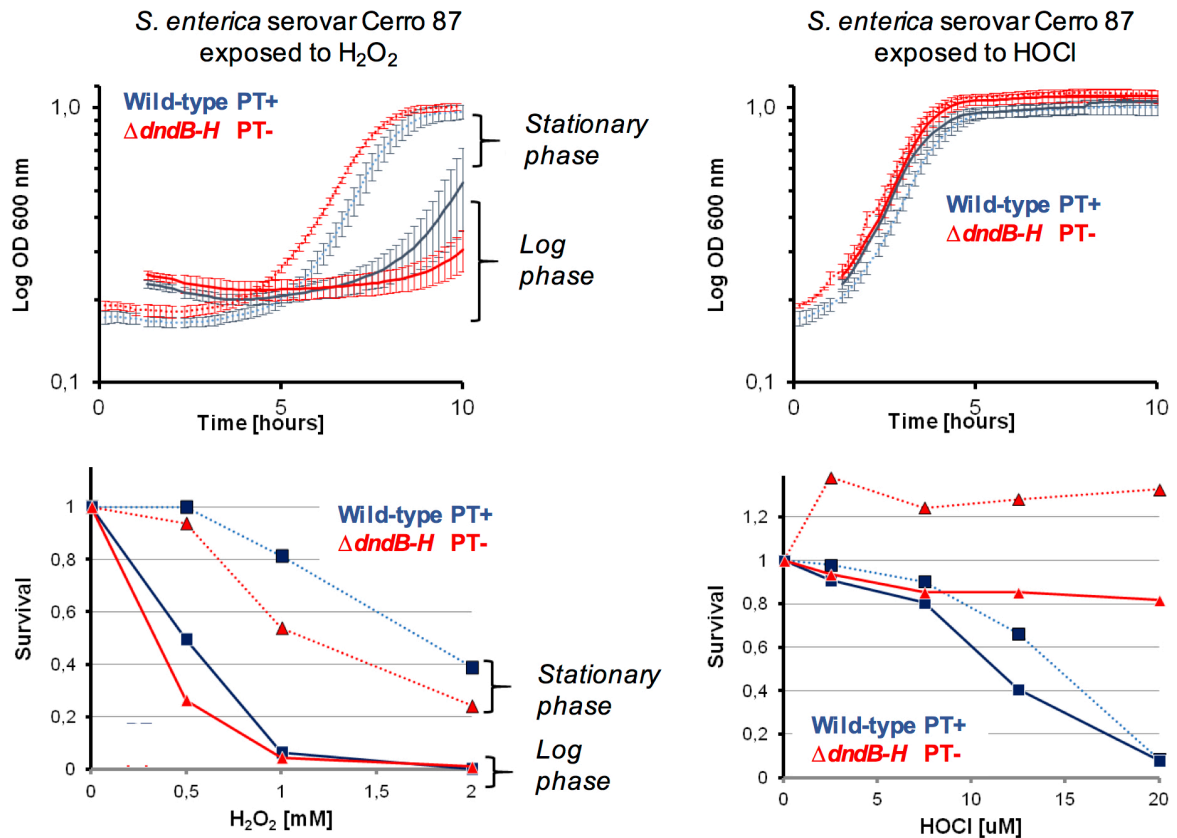

**Supplementary Figure 3: HOCl sensitivity of  $\Delta dndF-H$  and  $\Delta dndB$  *S. enterica* strains compared with wild-type and  $\Delta dndB-H$ .** Data represent mean  $\pm$  SD for 3 biological replicates.

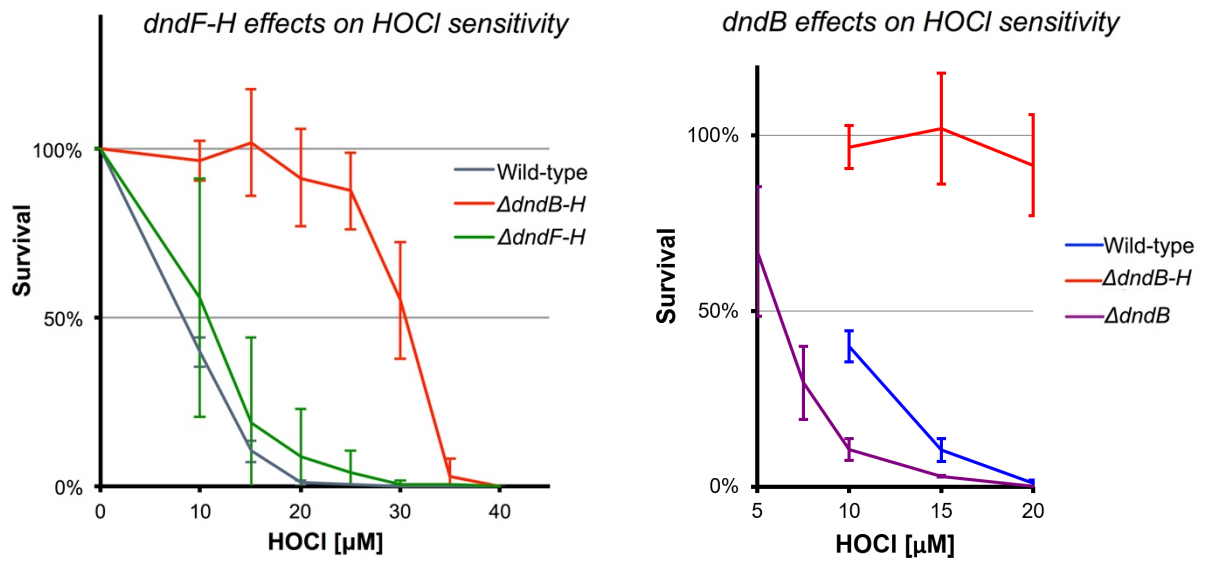

**Supplementary Figure 4: Products arising in reactions of PT dinucleotides with H<sub>2</sub>O<sub>2</sub> and HOCl.** (a) LC-MS/MS analysis of the reaction of d(G<sub>PS</sub>A) with 8 mM H<sub>2</sub>O<sub>2</sub> and 1 mM HOCl reveals desulfuration to form phosphate in d(G<sub>PO</sub>A) and phosphonate in d(G<sub>PH</sub>A), as well as dG and dA indicative of strand-breaks. (b) Positive ion mode, collision-induced dissociation product ion mass spectra of d(G<sub>PO</sub>A) and d(G<sub>PH</sub>A), difference highlighted in yellow boxes. (c) Concentration dependence of the reactions of d(G<sub>PS</sub>A) with H<sub>2</sub>O<sub>2</sub> and HOCl. Products were quantified as MS signal intensity in LC-MS analysis. (d) Reaction of d(G<sub>PO</sub>A) and d(G<sub>PH</sub>A) with 800 mM H<sub>2</sub>O<sub>2</sub>. The decrease in d(G<sub>PH</sub>A) is consistent with an oxidation-induced strand-break (Fig. 3, main text), but not d(G<sub>PO</sub>A) formation. (e) Comparison of the total ion chromatogram (TIC) and UV absorption for products formed in the reaction of d(G<sub>PS</sub>A) to 1 mM HOCl. Note that the elution time offset of the UV and MS signals is due to the fact that the in-line UV detector is positioned ahead of the MS system.

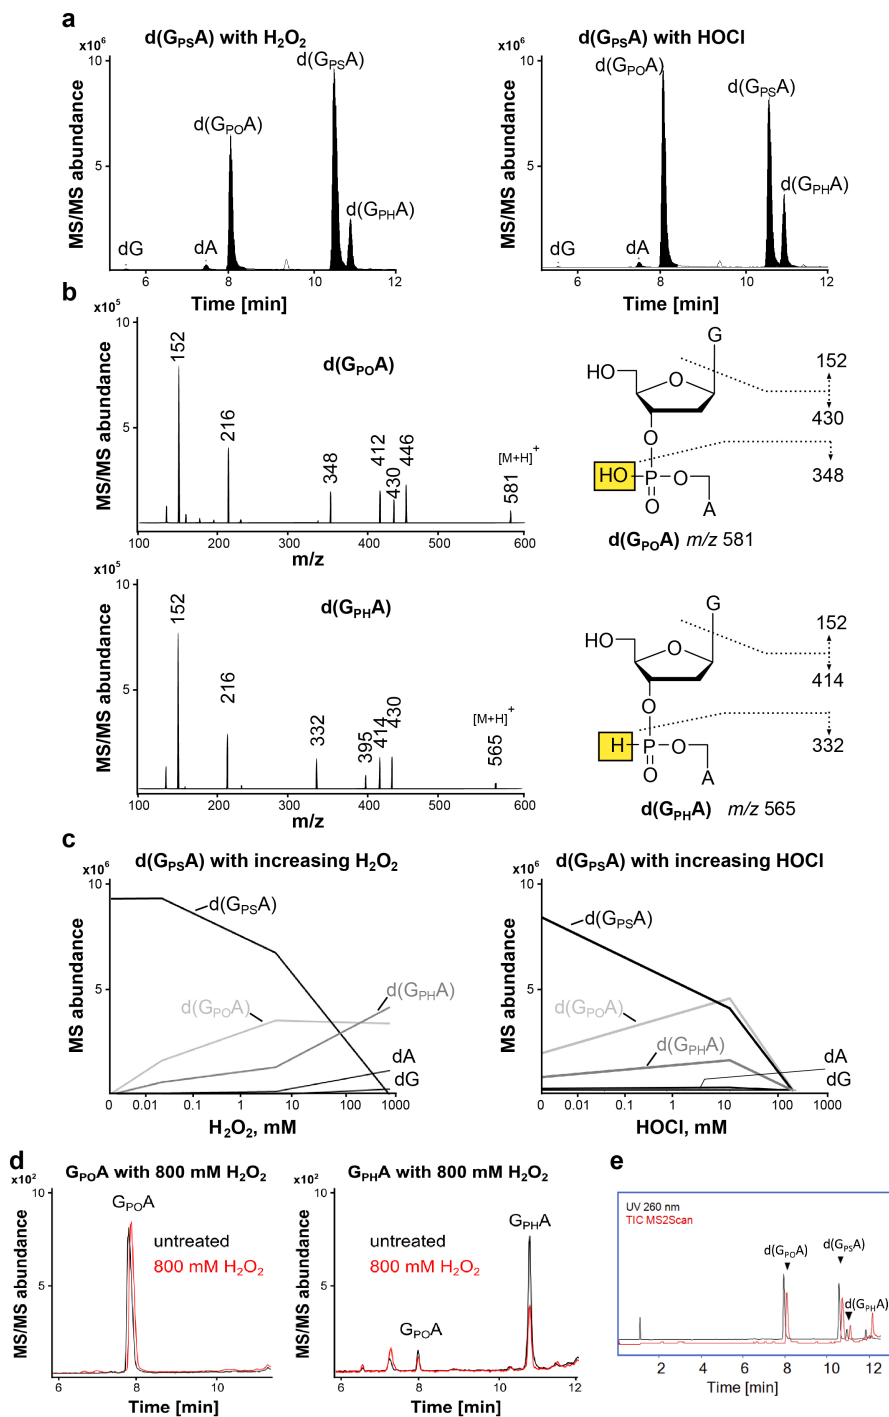

**Supplementary Figure 5: Agarose gel analysis of DNA isolated from oxidant-treated bacteria after 10 to 40 min of incubation.** Wild-type (right panel; PT+) and  $\Delta dndB-H$  (left panel; PT-) *S. enterica* strains were exposed to 150  $\mu$ M HOCl and genomic DNA (gDNA) was isolated at various times. The gDNA was then resolved on a 0.7% agarose gel. Lanes marked “(-)” contain DNA from unexposed bacteria.

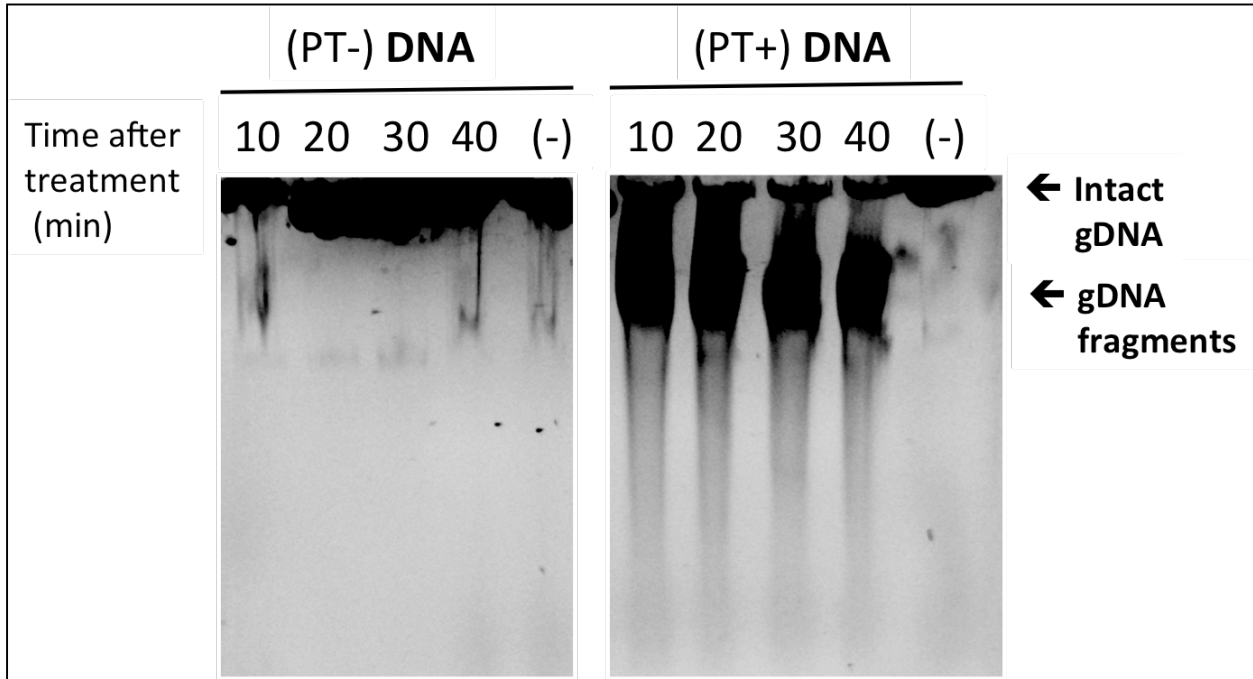

**Supplementary Figure 6: Mass spectra showing the different d(G<sub>PS</sub>T) isotopomers.**

The red mass spectrum with molecular ion [M+H]<sup>+</sup> *m/z* 597 represents the [<sup>34</sup>S]/[<sup>15</sup>N]-labeled d(G<sub>PS</sub>T) in original DNA strands. The black mass spectrum with molecular ion [M+H]<sup>+</sup> *m/z* 588 represents [<sup>32</sup>S]/[<sup>14</sup>N]-labeled d(G<sub>PS</sub>T) in newly replicated DNA strands. The grey mass spectrum with molecular ion [M+H]<sup>+</sup> *m/z* 595 represents [<sup>32</sup>S]/[<sup>15</sup>N]-labeled d(G<sub>PS</sub>T) in which original PT [<sup>34</sup>S] has been replaced with [<sup>32</sup>S].

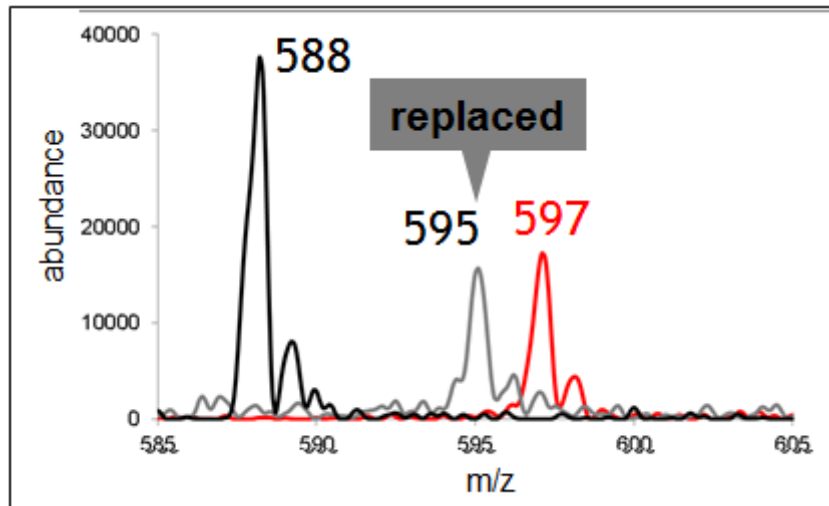

**Supplementary Figure 7: Estimation of the rate of PT turnover in untreated wild-type *S. enterica* serovar Cerro 87.** To calculate PT turnover events per hour (“rate”) as in Fig. 5c for *E. coli* B7A, PT turnover events quantified as the percentage of original PT levels are plotted versus sampling time. Regression analysis reveals a reasonable linear fit of these data, with the slope defining the percentage of PTs turning over per hour. The data shown in the graph are derived from untreated wild-type *S. enterica* serovar Cerro 87 and illustrate the regression analysis performed to estimate PT turnover rates for B7A and Cerro 87 in Fig. 5d. Data in the graph below represent mean values for 2 technical replicates from a single time course experiment, with the slopes from three different experiments averaged to yield the mean  $\pm$  SD data plotted in Figure 5d.

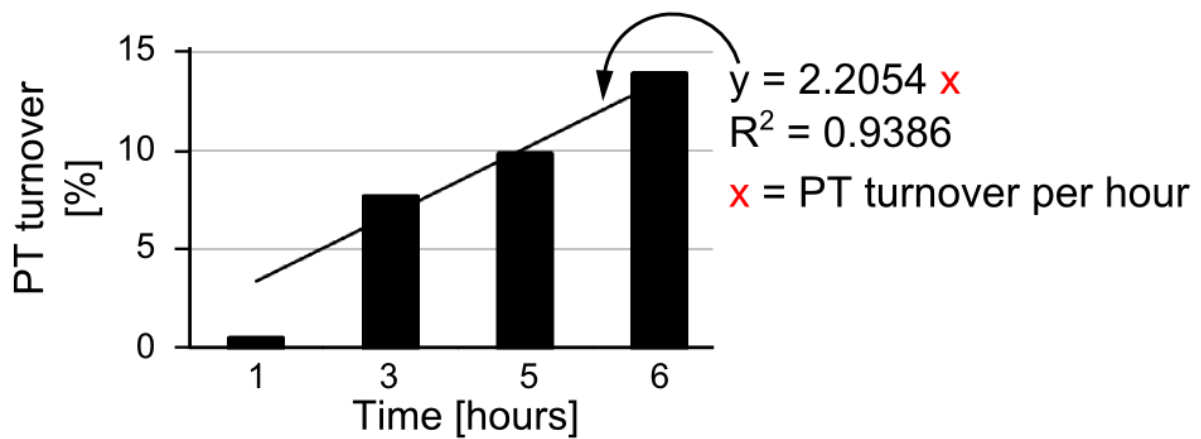



**Supplementary Figure 8: Percentage of all PT replaced, repaired or moved over time.**

On the left, PT turnover in *E. coli* B7A wild-type is shown. On the right, PT turnover for *S. enterica* Cerro 87 wild-type is shown. Used doses: *E. coli* B7A 0.8 mM H<sub>2</sub>O<sub>2</sub> (52% ±1.1% survival), 17.5 μM HOCl (50% ±1% survival) and *S. enterica* 1 mM H<sub>2</sub>O<sub>2</sub> (60% ±8% survival), 7.5 μM HOCl (36% ±8% survival). The error bars represent the standard deviation of the mean for 3 biological replicates.

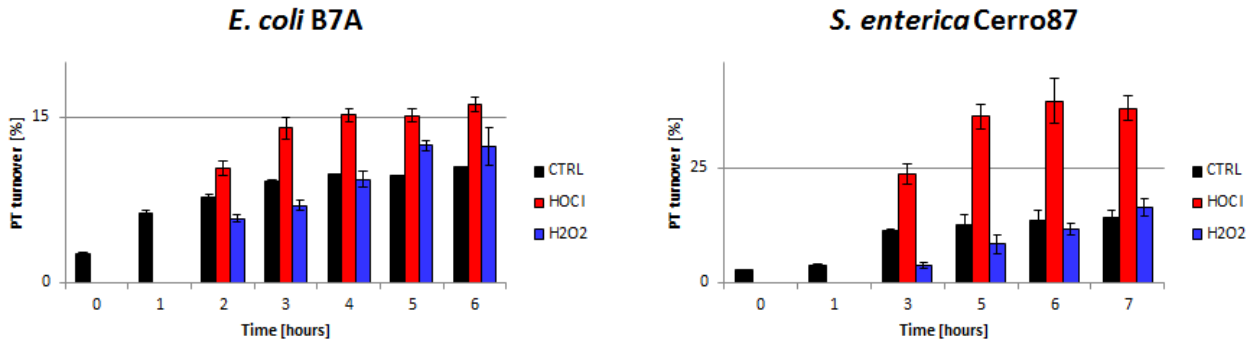

**Supplementary Figure 9: Full, uncut agarose gel images for Figures 4a and 4b. a)**

Uncropped and unedited agarose gel for Figure 4a. Isolated DNA from wild-type (PT<sup>+</sup>) and  $\Delta dndB-H$  (PT<sup>-</sup>) *E. coli* were exposed to 0.08–0.8 mM HOCl or 0.08–8 mM H<sub>2</sub>O<sub>2</sub>; iodine (I<sub>2</sub>) exposure serves as a positive control for PT-dependent strand breaks. HOCl-induced strand-breaks are apparent as smearing in the lane for DNA containing PT (PT<sup>+</sup>), but not for DNA lacking PT (PT<sup>-</sup>); strand-breaks are not detectable for H<sub>2</sub>O<sub>2</sub> exposure in any case. **b)**

Uncropped and unedited agarose gel for Figure 4b. WT and  $\Delta dndB-H$  *E. coli* cells were exposed to 7.5- and 25-times the WT LD<sub>50</sub> concentration of H<sub>2</sub>O<sub>2</sub> or HOCl for 10 min (4 and 14 mM for H<sub>2</sub>O<sub>2</sub>; 0.13 and 0.43 for HOCl). Again, DNA isolated from HOCl-exposed WT bacteria, but not PT<sup>-</sup> bacteria, shows strand-breaks, while no strand breaks are apparent after H<sub>2</sub>O<sub>2</sub> treatment in either strain.

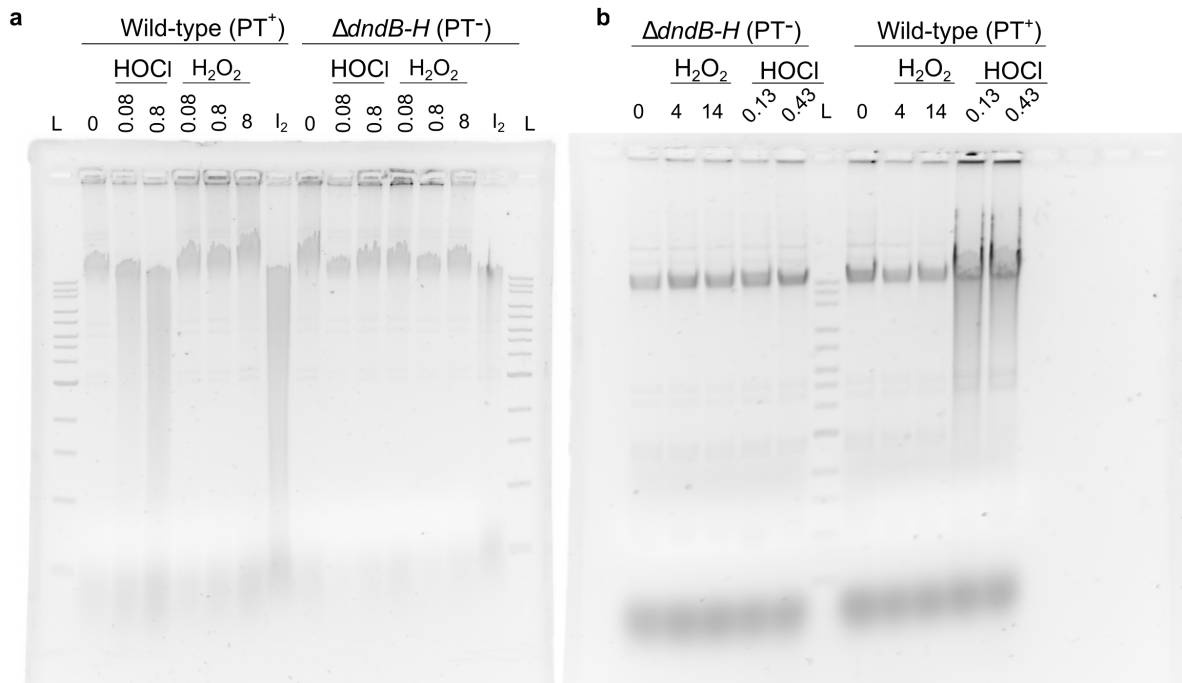

## Supplementary Tables

Supplementary Table 1: Overview of bacterial strains and their PT levels

| Strain                                                             | PT per 10 <sup>6</sup> nts |
|--------------------------------------------------------------------|----------------------------|
| <i>E. coli</i> B7A WT <sup>6</sup>                                 | 875 ± 68                   |
| <i>E. coli</i> B7A Δ <i>dndB</i> -H <sup>6</sup>                   | Not detectable             |
| <i>E. coli</i> B7A Δ <i>dndF</i> -H <sup>6</sup>                   | 858 ± 36                   |
| <i>S. enterica</i> serovar Cerro 87 WT <sup>13</sup>               | 620±41                     |
| <i>S. enterica</i> serovar Cerro 87 Δ <i>dndB</i> <sup>13</sup>    | 1236 ± 53                  |
| <i>S. enterica</i> serovar Cerro 87 Δ <i>dndB</i> -H <sup>13</sup> | Not detectable             |
| <i>S. enterica</i> serovar Cerro 87 Δ <i>dndF</i> -H <sup>13</sup> | 658 ± 38                   |

Supplementary Table 2: Parameters for LC-MS/MS detection of PT isotopomers

| Compound                                                   | Precursor ion <i>m/z</i> | Product ion <i>m/z</i> | Fragmentor (V) | Collision energy (eV) | Ret Time (min) | ΔRet Time (min) |
|------------------------------------------------------------|--------------------------|------------------------|----------------|-----------------------|----------------|-----------------|
| dA                                                         | 252.2                    | 136.1                  | 170            | 20                    | 5              | 2               |
| [ <sup>15</sup> N]-dA                                      | 257.2                    | 141.1                  | 170            | 20                    | 5              | 2               |
| [ <sup>15</sup> N]/[ <sup>34</sup> S]-d(G <sub>ps</sub> A) | 609.4                    | 141.1                  | 120            | 40                    | 8              | 2               |
| [ <sup>15</sup> N]/[ <sup>32</sup> S]-d(G <sub>ps</sub> A) | 607.4                    | 141.1                  | 120            | 40                    | 8              | 2               |
| [ <sup>14</sup> N]/[ <sup>32</sup> S]-d(G <sub>ps</sub> A) | 597.4                    | 136.1                  | 120            | 40                    | 8              | 2               |
| [ <sup>14</sup> N]/[ <sup>34</sup> S]-d(G <sub>ps</sub> A) | 599.4                    | 136.1                  | 120            | 40                    | 8              | 2               |
| [ <sup>13</sup> C]-d(G <sub>ps</sub> A)                    | 617.4                    | 141.1                  | 120            | 40                    | 8              | 2               |
| [ <sup>15</sup> N]/[ <sup>34</sup> S]-d(G <sub>ps</sub> T) | 597.4                    | 157.1                  | 110            | 17                    | 9.5            | 2               |
| [ <sup>15</sup> N]/[ <sup>32</sup> S]-d(G <sub>ps</sub> T) | 595.4                    | 157.1                  | 110            | 17                    | 9.5            | 2               |
| [ <sup>14</sup> N]/[ <sup>32</sup> S]-d(G <sub>ps</sub> T) | 588.4                    | 152.1                  | 110            | 17                    | 9.5            | 2               |
| [ <sup>14</sup> N]/[ <sup>34</sup> S]-d(G <sub>ps</sub> T) | 590.4                    | 152.1                  | 110            | 17                    | 9.5            | 2               |
| [ <sup>13</sup> C]-d(G <sub>ps</sub> T)                    | 608.4                    | 157.1                  | 110            | 17                    | 9.5            | 2               |

Supplementary Table 3: Doses of H<sub>2</sub>O<sub>2</sub> and HOCl used in analysis of DNA damage in bacteria. Data represent mean ±SD for 3 biological replicates.

|                    | Strain           | H <sub>2</sub> O <sub>2</sub> , μM |                  |                       |                      | HOCl, μM         |                  |                       |                      |
|--------------------|------------------|------------------------------------|------------------|-----------------------|----------------------|------------------|------------------|-----------------------|----------------------|
|                    |                  | LD <sub>50</sub>                   | LD <sub>80</sub> | 7.5xL D <sub>50</sub> | 25x LD <sub>50</sub> | LD <sub>50</sub> | LD <sub>80</sub> | 7.5x LD <sub>50</sub> | 25x LD <sub>50</sub> |
| <i>E. coli</i>     | Wild-type        | 555±163                            | 2100             | 4162                  | 13875                | 17±0.9           | 27               | 128                   | 425                  |
|                    | Δ <i>dndB</i>    |                                    |                  |                       |                      |                  |                  |                       |                      |
|                    | Δ <i>dndB</i> -H | 383±59                             |                  |                       |                      | 21±2.8           |                  |                       |                      |
| <i>S. enterica</i> | Wild-type        | 524±81                             | 1350             | 3930                  | 13100                | 6.0±0.3          | 15.6             | 45                    | 150                  |
|                    | Δ <i>dndB</i>    |                                    |                  |                       |                      | 3.7±1.8          |                  |                       |                      |
|                    | Δ <i>dndB</i> -H | 381±128                            |                  |                       |                      | 29±0.2           |                  |                       |                      |
|                    | Δ <i>dndF</i> -H |                                    |                  |                       |                      | 9.5±4.8          |                  |                       |                      |
